# Supplementary material for: Zn Supplementation Mitigates Drought Effects on Cotton by Improving Photosynthetic Performance and Antioxidant Defense Mechanisms
Source: MDPI journal article supplement (doi:10.3390/antiox12040854), 2023-04-01
Supplement: s1 [file s1]

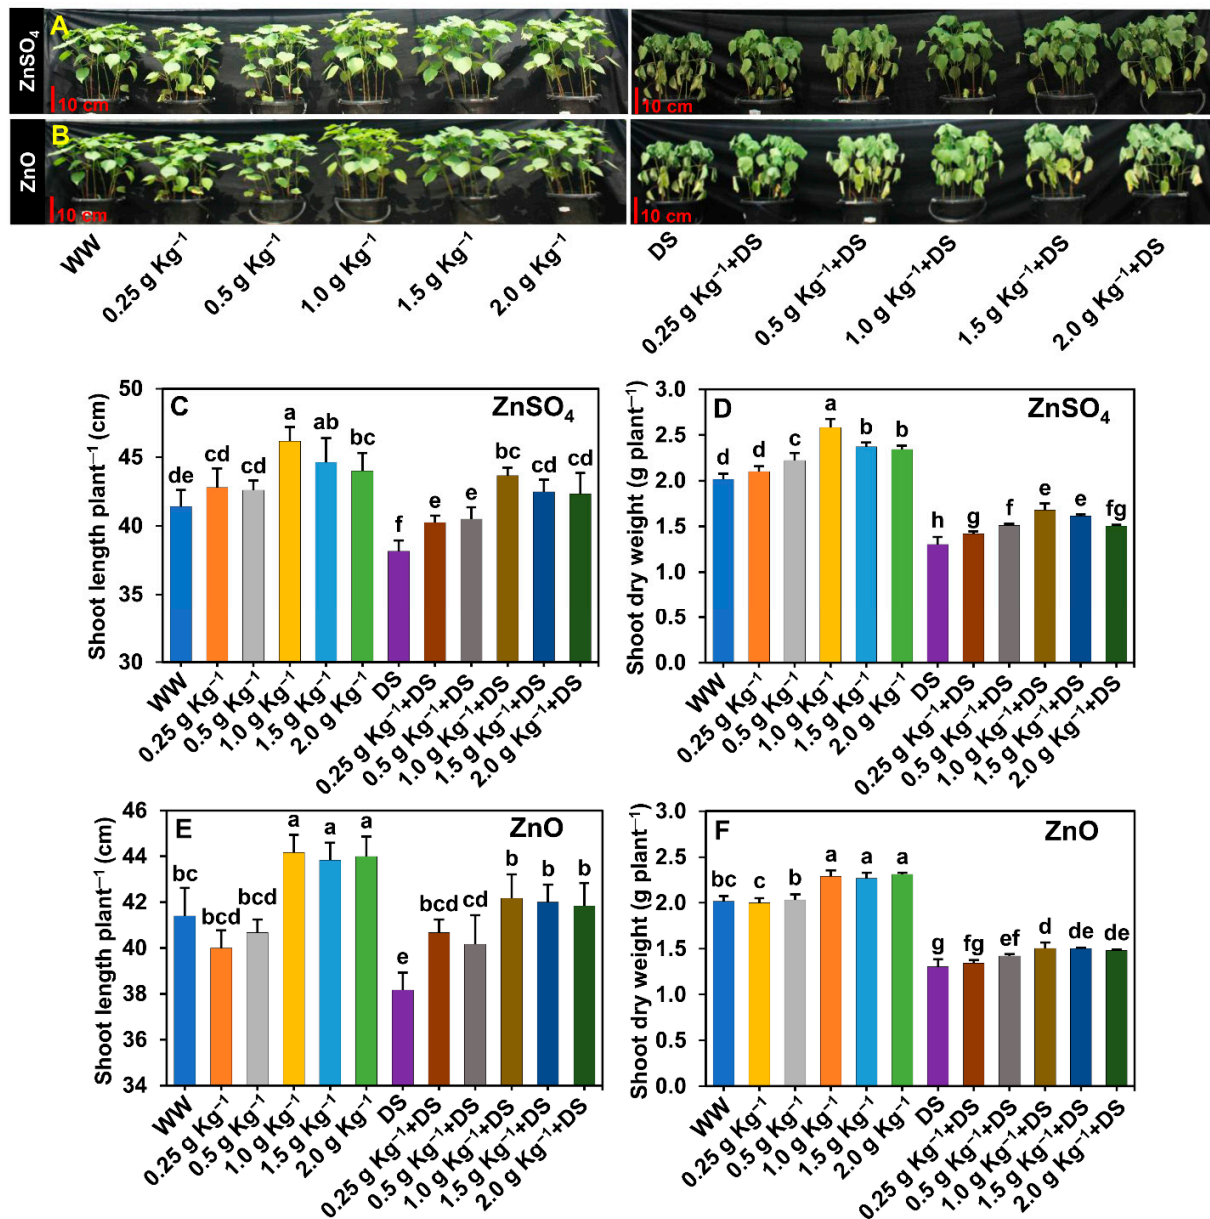

**Figure S1.** Effect of separately applied different doses of ZnSO<sub>4</sub> (0.25, 0.5, 1.0, 1.5, and 2.0 g Kg<sup>-1</sup> soil) and ZnO (0.25, 0.5, 1.0, 1.5, and 2.0 g Kg<sup>-1</sup> soil) on cotton plants that were subjected to water deprivation-induced drought stress for 6 days. (A,B) Cotton plants were photographed after being subjected to drought stress. (C) Shoot length and (D) shoot dry weight of cotton plants supplemented with different doses of ZnSO<sub>4</sub>. (E) Shoot length and (F) shoot dry weight of cotton plants supplemented with different doses of ZnO. The means and standard deviations ( $n = 3$ ) are displayed as bars. Significant changes ( $p < 0.05$ ) among the treatments are denoted by different letters above the bars as calculated using the least significant difference test. WW, well-watered plants; DS, drought-stressed plants.
